# Supplementary material
Source: PubMed Central journal article supplement (PMC7254779)
Supplement: ao0c00989_si_001.pdf [file ao0c00989_si_001.pdf]

**Pyridyl CO<sub>2</sub> Fixation Enabled by a Secondary Hydrogen Bonding  
Coordination Sphere**

Jacqueline N. Gayton,<sup>a</sup> Qing Li,<sup>a</sup> Lakeeta Sanders,<sup>b</sup> Roberta R. Rodrigues,<sup>a</sup> Glake Hill,<sup>b</sup> and  
Jared H. Delcamp<sup>a,\*</sup>

<sup>a</sup> Department of Chemistry and Biochemistry, University of Mississippi, University, MS, 38677

<sup>b</sup> Department of Chemistry, Jackson State University, Jackson, MS, 39217

\* email: delcamp@olemiss.edu

## Table of Contents

- Page S3** Absorption spectrum of py-1 in DMF with and without electrolyte, with peak absorption curve normalized (**Figure S1**)
- Page S3** Absorption spectrum of py-1 in MeCN with and without electrolyte, with peak absorption curve normalized (**Figure S2**)
- Page S4** Absorption spectrum of py-1 in THF with and without electrolyte, with peak absorption curve normalized (**Figure S3**)
- Page S4** Absorption spectrum of py-2 in DMF with and without electrolyte, with peak emission intensity curve normalized (**Figure S4**)
- Page S5** Absorption spectrum of py-2 in MeCN with and without electrolyte, with peak absorption curve normalized (**Figure S5**)
- Page S5** Absorption spectrum of py-3 in DMF with and without electrolyte, with peak absorption curve normalized (**Figure S6**)
- Page S6** Absorption spectrum of py-3 in MeCN with and without electrolyte, with peak emission intensity curve normalized (**Figure S7**)
- Page S6** Absorption spectrum of py-3 in THF with and without electrolyte, with peak emission intensity curve normalized (**Figure S8**)
- Page S7** Absorption spectrum of py-4 in DMF with and without electrolyte, with peak emission intensity curve normalized (**Figure S9**)
- Page S7** Absorption spectrum of py-4 in MeCN with and without electrolyte, with peak absorption curve normalized (**Figure S10**)
- Page S8** Absorption spectrum of py-5 in DMF with and without electrolyte, with peak absorption curve normalized (**Figure S11**)
- Page S8** Emission spectrum of py-1 in THF with and without electrolyte, with peak absorption curve normalized (**Figure S12**)
- Page S9** Emission spectrum of py-2 in DMF with and without electrolyte, with peak emission intensity curve normalized (**Figure S13**)
- Page S9** Emission spectrum of py-2 in MeCN with and without electrolyte, with peak emission intensity curve normalized (**Figure S14**)
- Page S10** Emission spectrum of py-3 in DMF with and without electrolyte, with peak absorption curve normalized (**Figure S15**)
- Page S10** Emission spectrum of py-3 in THF with and without electrolyte, with peak absorption curve normalized (**Figure S16**)
- Page S11** Emission spectrum of py-4 in DMF with and without electrolyte, with peak emission intensity curve normalized (**Figure S17**)
- Page S11** Emission spectrum of py-4 in THF with and without electrolyte, with peak emission intensity curve normalized (**Figure S18**)
- Page S12** Cyclic voltammetry of py-2 in THF with electrolyte under Argon and CO<sub>2</sub> (**Figure S19**)
- Page S13** <sup>1</sup>H NMR data showing CO<sub>2</sub> binding with py-2 in CD<sub>3</sub>CN-d<sub>3</sub> (**Figure S20**)
- Page S14** <sup>1</sup>H NMR data showing CO<sub>2</sub> binding with py-2 in DMF-d<sub>7</sub> (**Figure S21**)
- Page S15** <sup>1</sup>H NMR data showing CO<sub>2</sub> binding with py-2 in THF-d<sub>8</sub> (**Figure S22**)
- Page S16** HOMO and LUMO orbitals for each receptor with and without CO<sub>2</sub> bound (**Figure S23**)
- Page S17** Optimized geometries at the M06-2X/6-311G(*d*) level for computational models of py-1, py-3, py-4, and py-5 with CO<sub>2</sub> bound (**Figure S24**)
- Page S18** XYZ coordinates of the receptors with and without CO<sub>2</sub>.

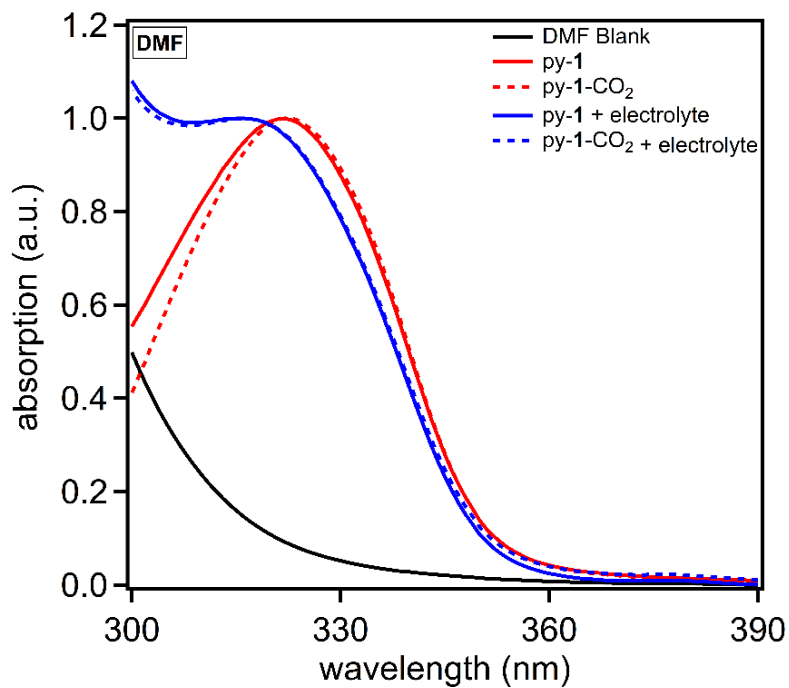

**Figure S1.** Absorption spectrum of py-1 in DMF with and without electrolyte with the absorption curve peaks normalized.

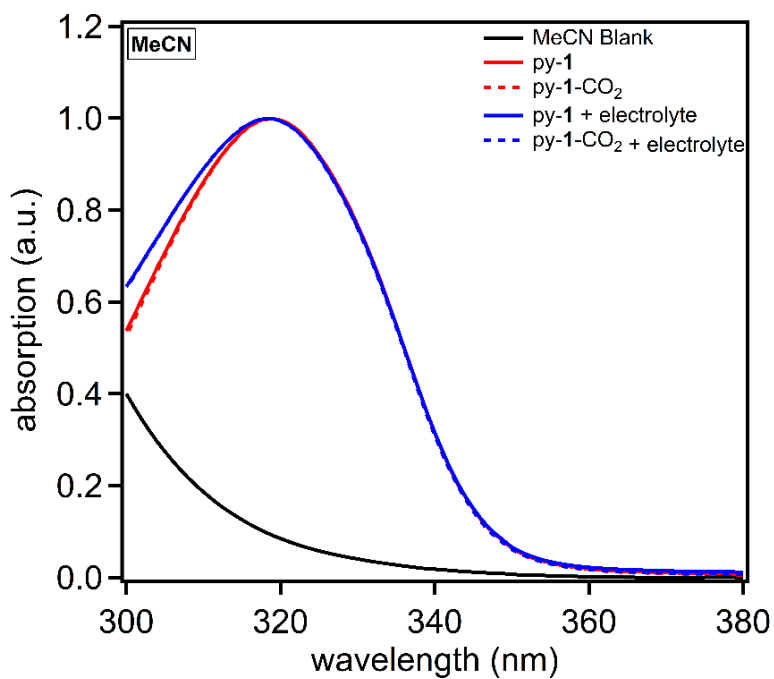

**Figure S2.** Absorption spectrum of py-1 in MeCN with and without electrolyte with the absorption curve peaks normalized.

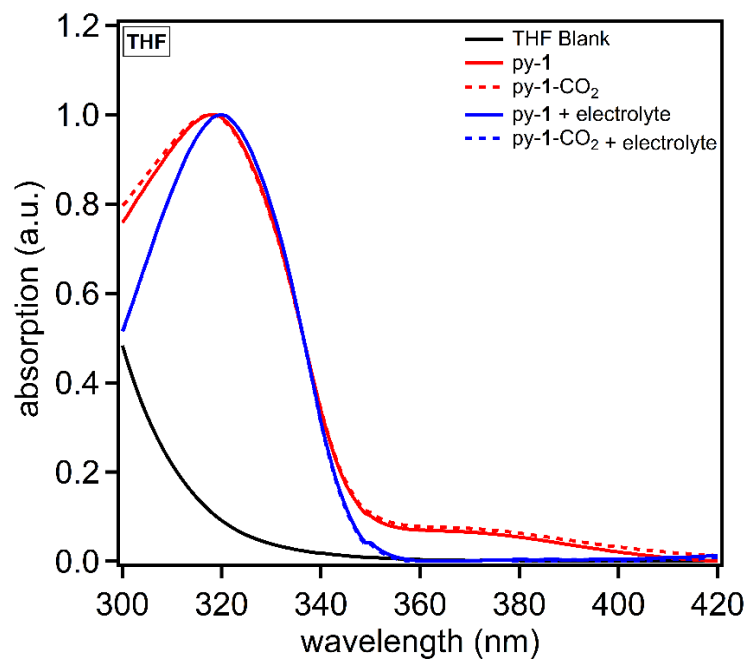

**Figure S3.** Absorption spectrum of py-1 in THF with and without electrolyte with the absorption curve peaks normalized.

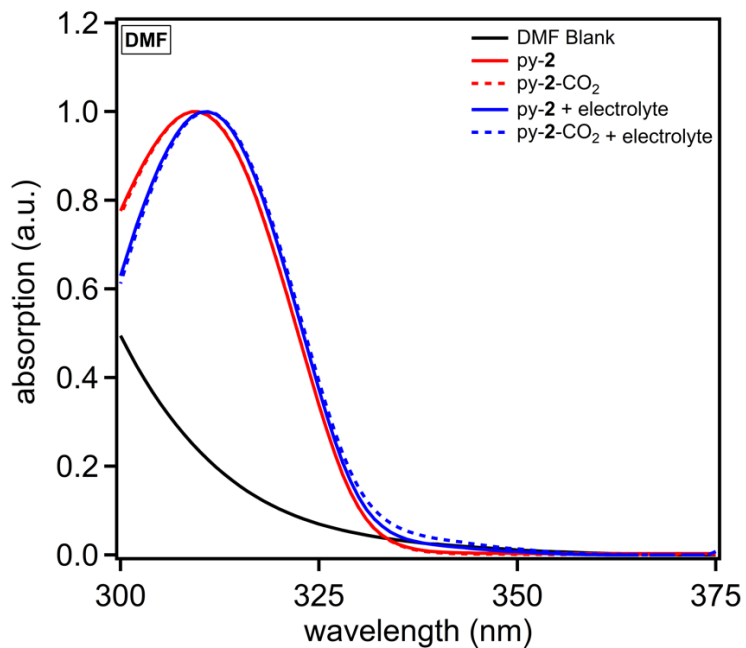

**Figure S4.** Absorption spectrum of py-2 in DMF with and without electrolyte with the absorption curve peaks normalized.

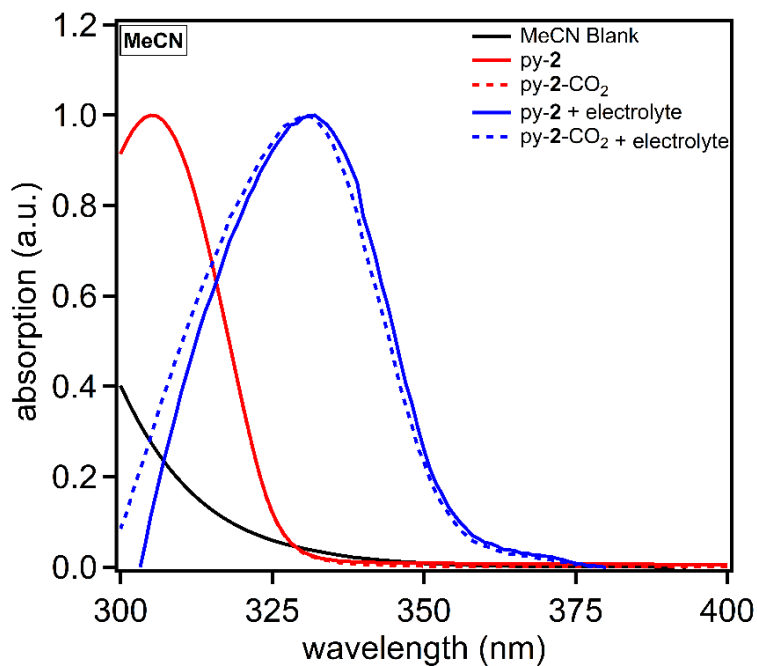

**Figure S5.** Absorption spectrum of py-2 in MeCN with and without electrolyte with the absorption curve peaks normalized.

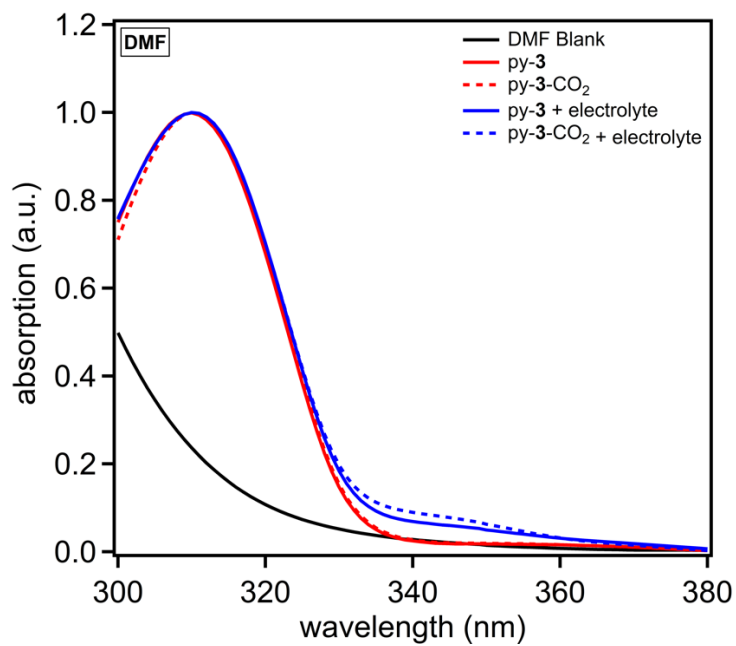

**Figure S6.** Absorption spectrum of py-3 in DMF with and without electrolyte with the absorption curve peaks normalized.

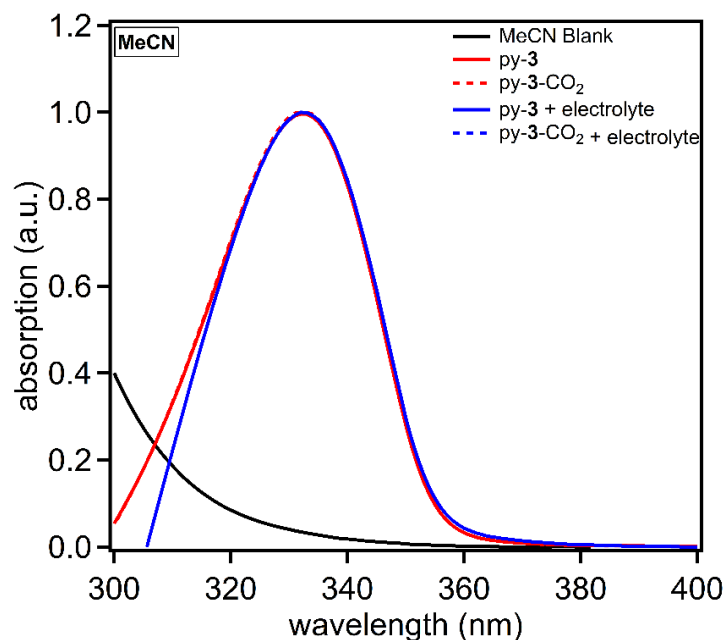

**Figure S7.** Absorption spectrum of py-3 in MeCN with and without electrolyte with the absorption curve peaks normalized.

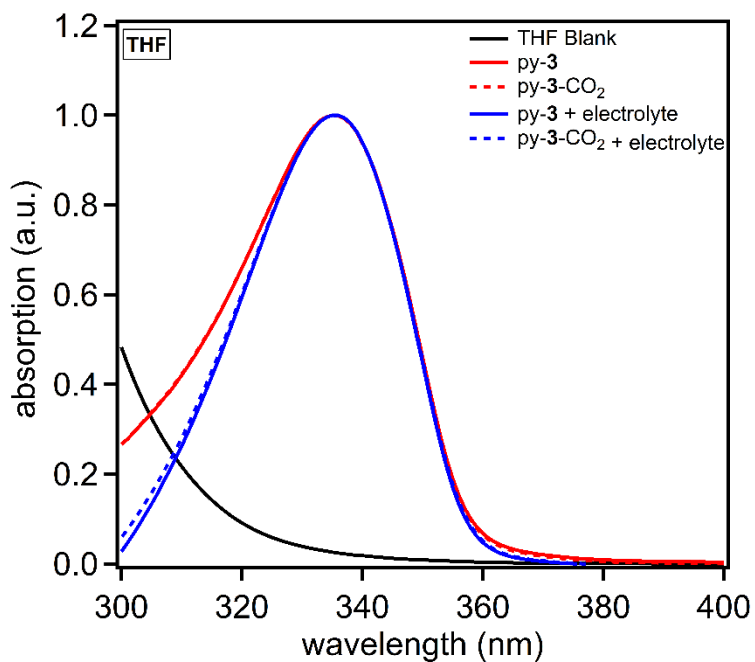

**Figure S8.** Absorption spectrum of py-3 in THF with and without electrolyte with the absorption curve peaks normalized.

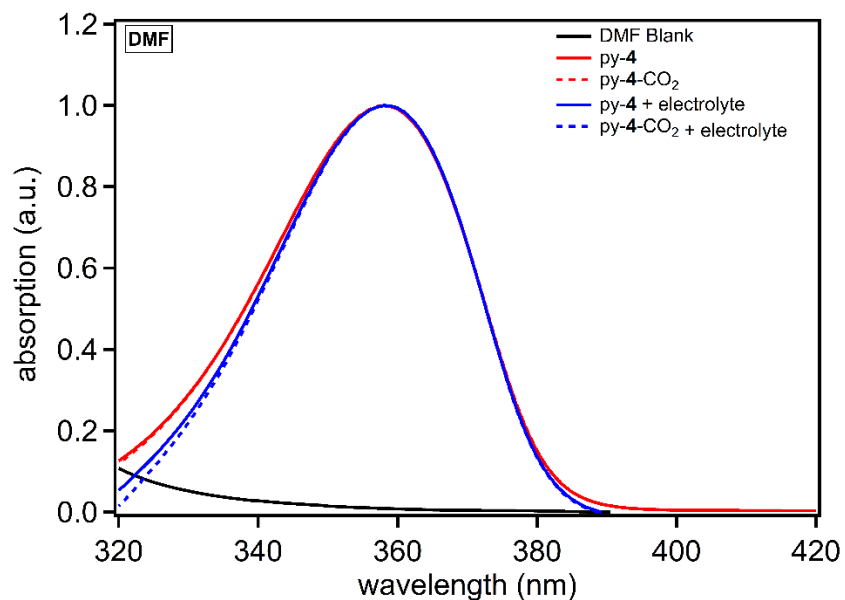

**Figure S9.** Absorption spectrum of py-4 in DMF with and without electrolyte with the absorption curve peaks normalized.

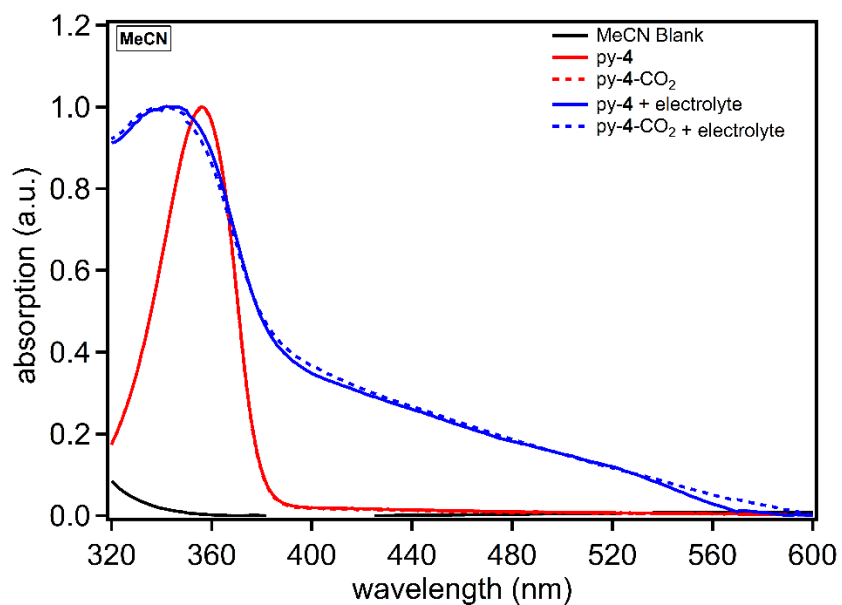

**Figure S10.** Absorption spectrum of py-4 in MeCN with and without electrolyte with the absorption curve peaks normalized.

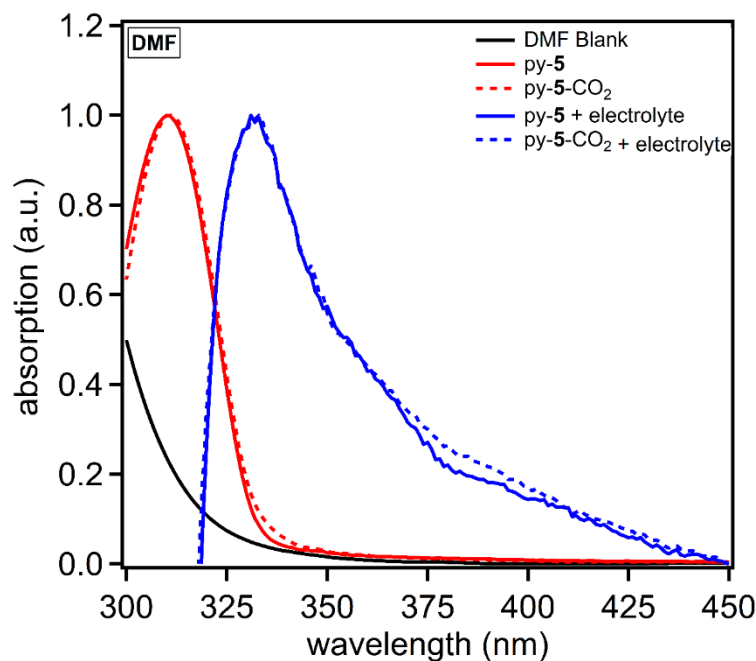

**Figure S11.** Absorption spectrum of py-5 in DMF with and without electrolyte with the absorption curve peaks normalized.

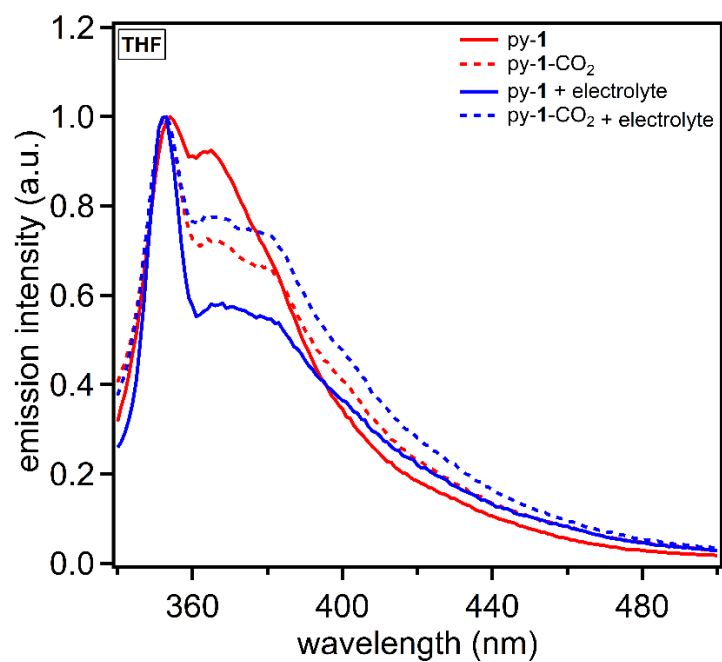

**Figure S12.** Emission spectrum of py-1 in THF with and without electrolyte with the emission peak intensity normalized.



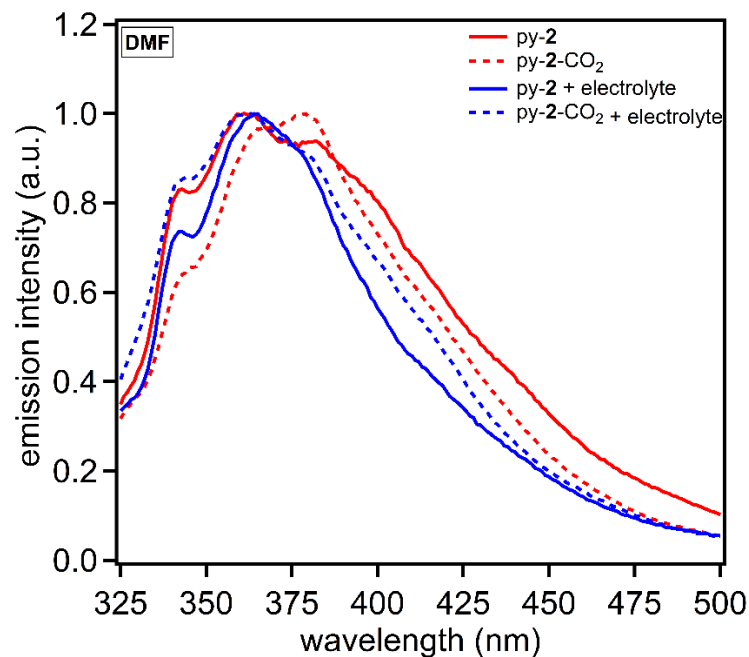

**Figure S13.** Emission spectrum of py-2 in DMF with and without electrolyte with the emission peak intensity normalized.

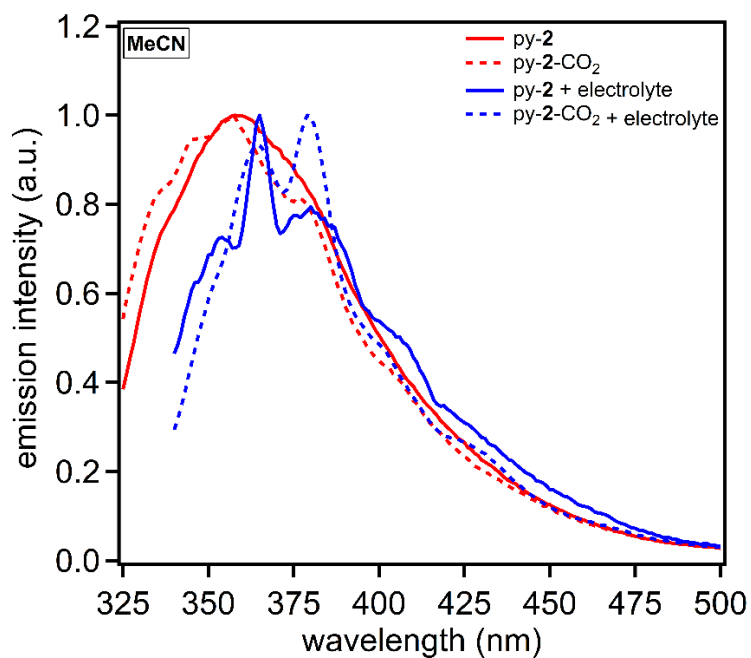

**Figure S14.** Emission spectrum of py-2 in MeCN with and without electrolyte with the emission peak intensity normalized.

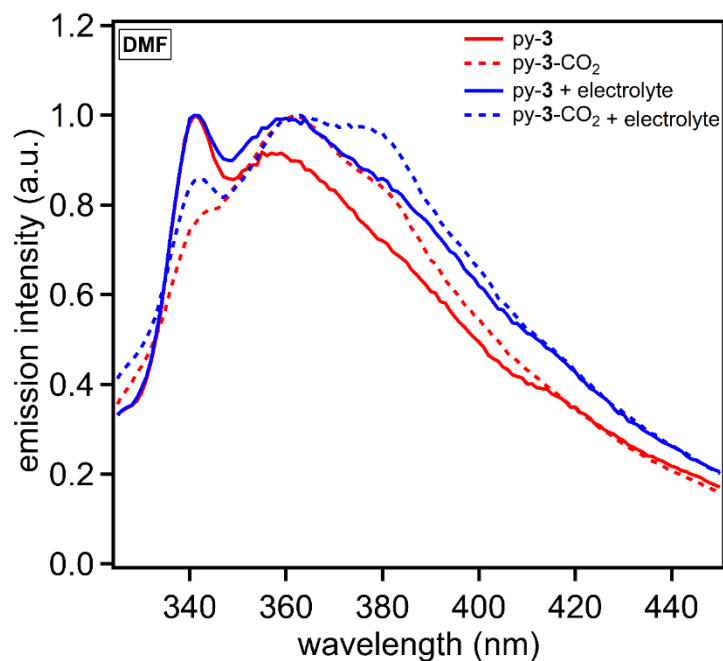

**Figure S15.** Emission spectrum of py-3 in DMF with and without electrolyte with the emission peak intensity normalized.

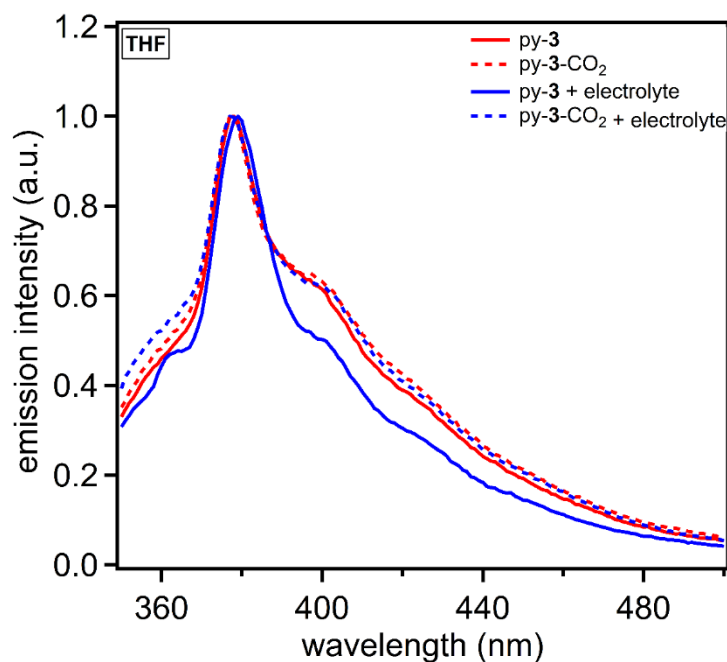

**Figure S16.** Emission spectrum of py-3 in THF with and without electrolyte with the emission peak intensity normalized.

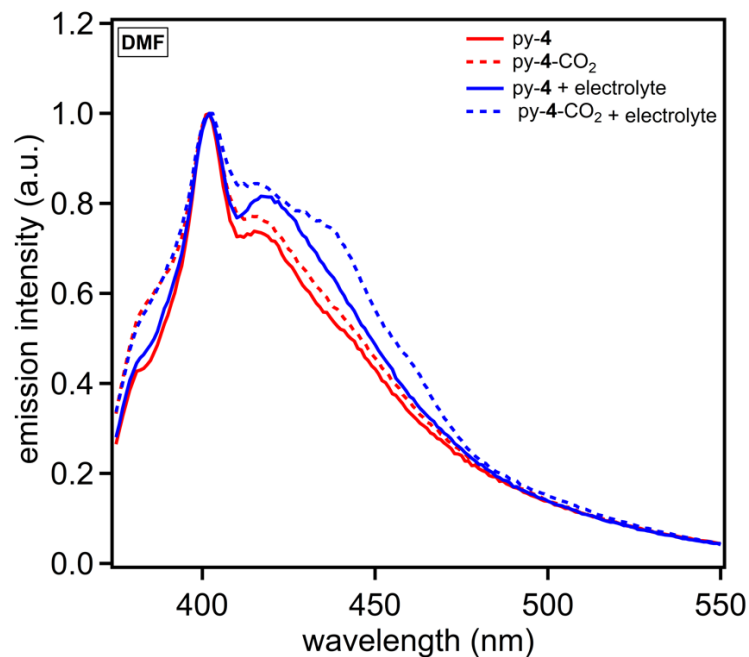

**Figure S17.** Emission spectrum of py-4 in DMF with and without electrolyte with the emission peak intensity normalized.

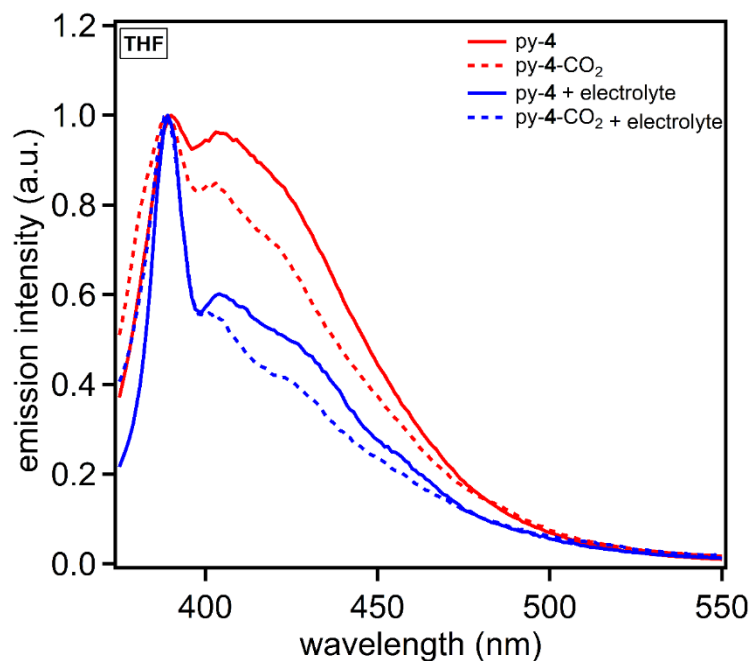

**Figure S18.** Emission spectrum of py-4 in THF with and without electrolyte with the emission peak intensity normalized.

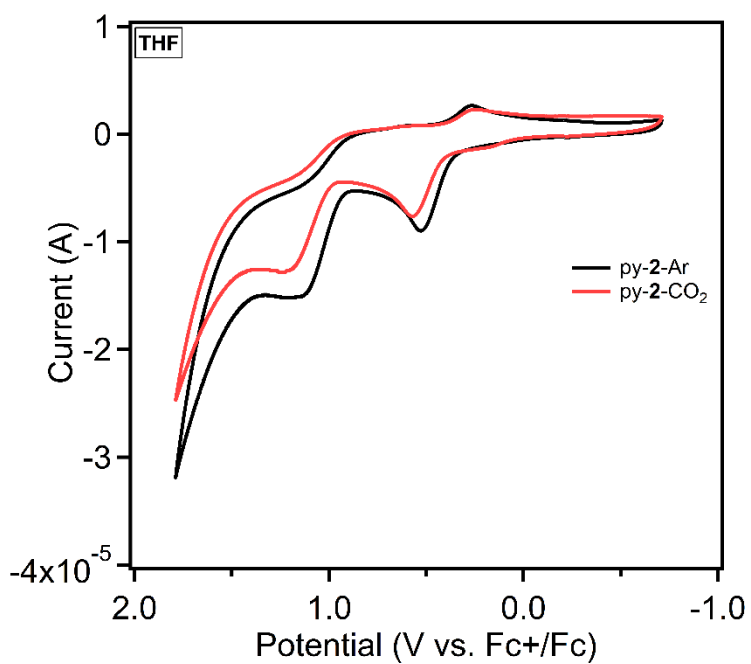

**Figure S19.** Cyclic voltammetry of py-2 in THF with electrolyte under argon and CO<sub>2</sub>.

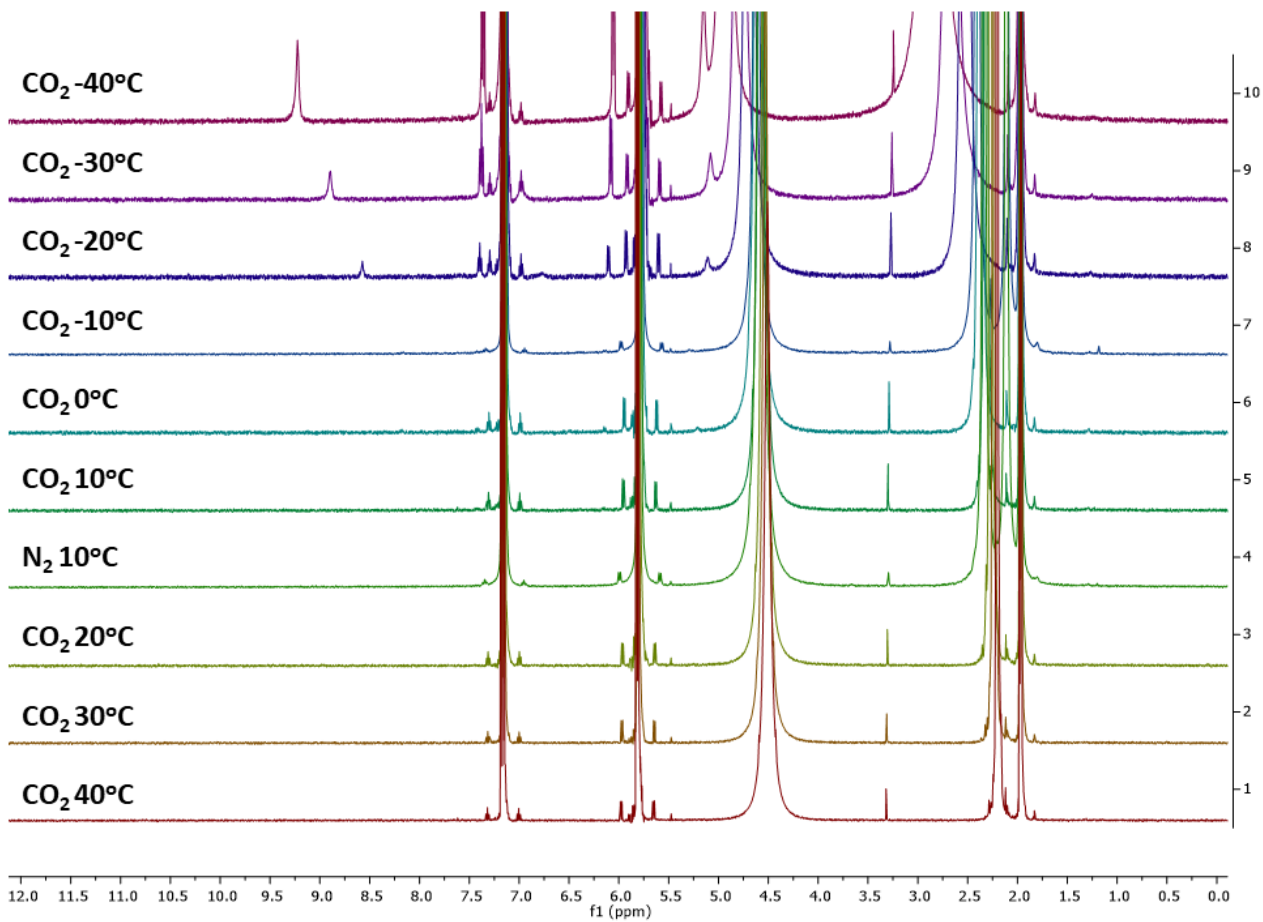

**Figure S20.** <sup>1</sup>H NMR data showing CO<sub>2</sub> binding with py-2 in CD<sub>3</sub>CN-d<sub>3</sub>.

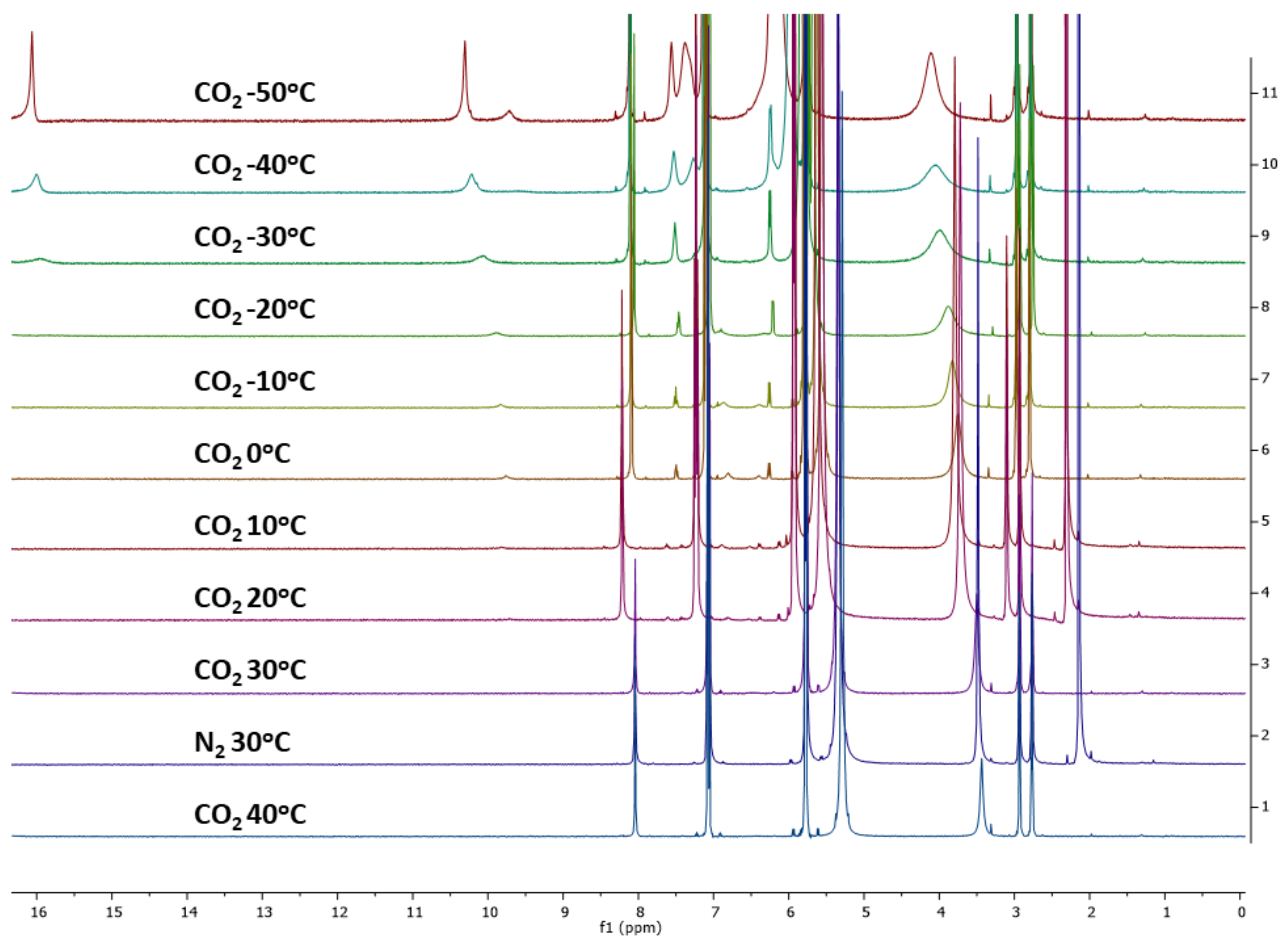

**Figure S21.**  $^1\text{H}$  NMR data showing  $\text{CO}_2$  binding with py-2 in  $\text{DMF-d}_7$ .

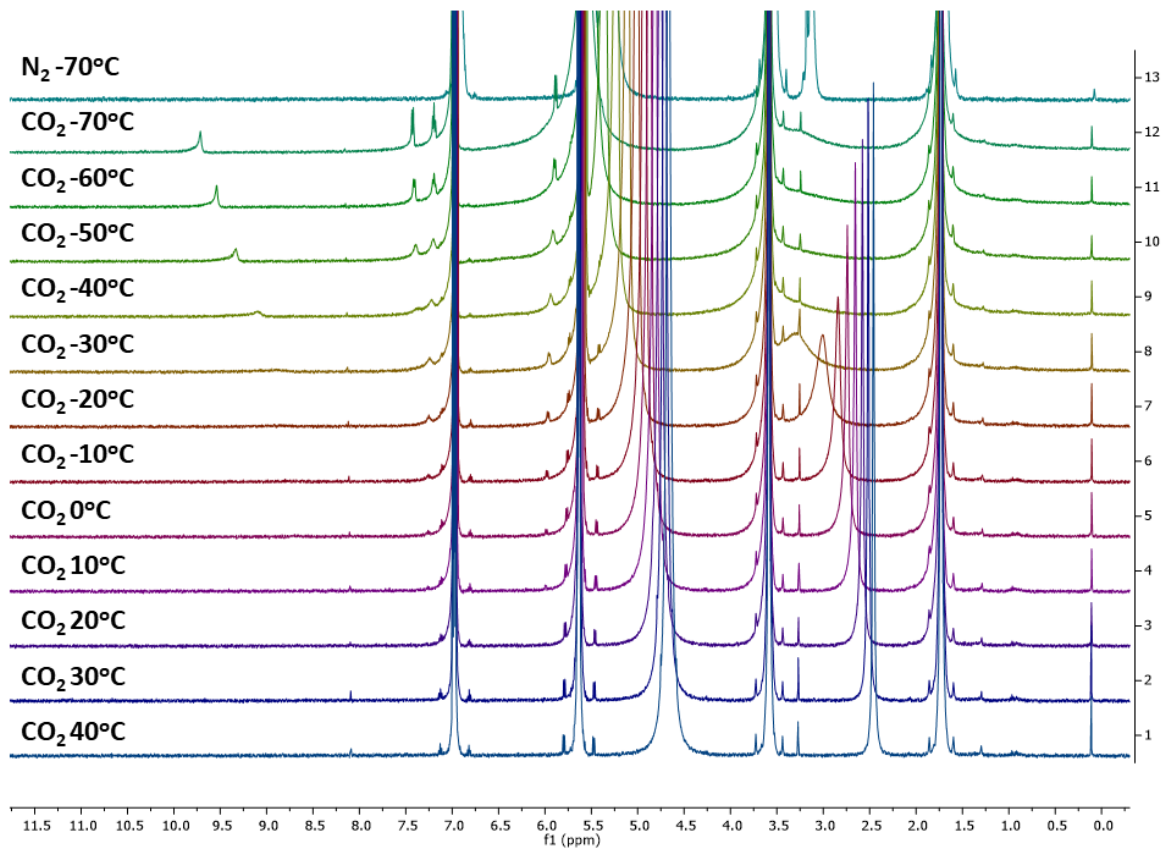

**Figure S22.** <sup>1</sup>H NMR data showing CO<sub>2</sub> binding with py-2 in THF-d<sub>8</sub>.

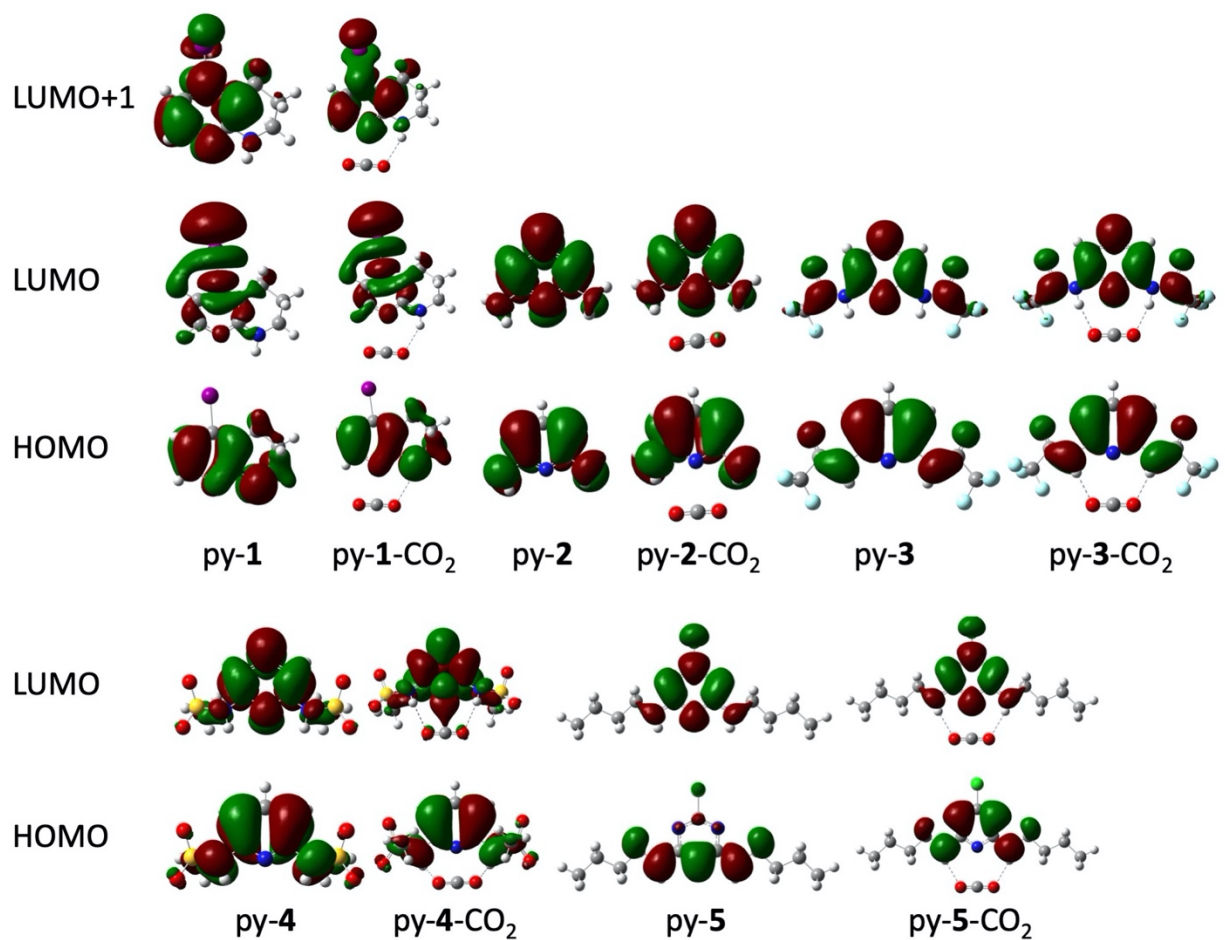

**Figure S23.** HOMO, LUMO, and select LUMO+1 orbitals (based on significant contributions to the  $S_0 \rightarrow S_1$  vertical transition) for py-1 through py-5 with and without CO<sub>2</sub> bound.



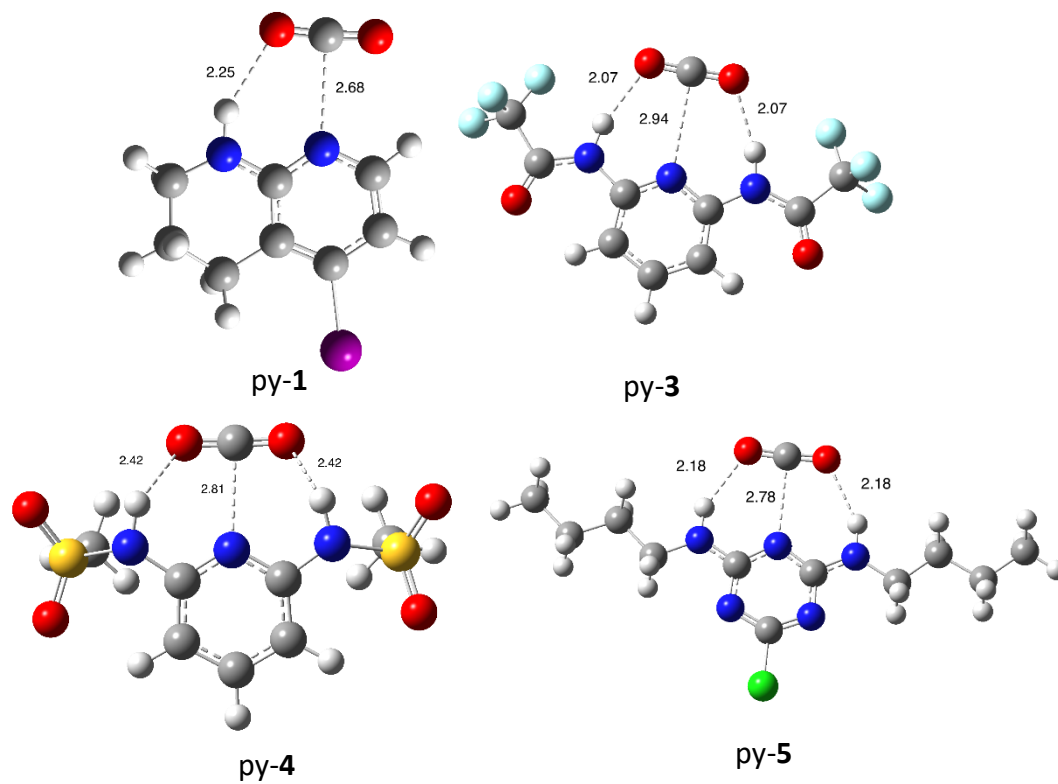

**Figure S24.** Optimized geometries at the M06-2X/6-311G(*d*) level for computational models of py-1, py-3, py-4, and py-5 with CO<sub>2</sub> bound. Bond lengths are given in angstroms.

py-1 XYZ Coordinates (the first column is atomic number)

|    |           |           |           |
|----|-----------|-----------|-----------|
| 6  | -0.939230 | 2.691730  | 0.054911  |
| 6  | -2.075400 | 0.715036  | 0.016553  |
| 6  | -0.882735 | -0.055593 | 0.026924  |
| 6  | 0.292780  | 0.673494  | 0.030265  |
| 6  | 0.296815  | 2.065988  | 0.049012  |
| 1  | -0.998327 | 3.776307  | 0.070739  |
| 6  | -0.949590 | -1.565970 | 0.017102  |
| 1  | 1.215242  | 2.635714  | 0.053648  |
| 6  | -2.339098 | -2.084683 | 0.387894  |
| 6  | -3.412578 | -1.304933 | -0.359620 |
| 1  | -0.207107 | -1.968960 | 0.709533  |
| 1  | -2.414569 | -3.149439 | 0.158841  |
| 1  | -4.408537 | -1.653698 | -0.082884 |
| 7  | -3.298664 | 0.092014  | 0.009165  |
| 1  | -4.064386 | 0.716251  | -0.195644 |
| 7  | -2.101702 | 2.048152  | 0.031515  |
| 1  | -0.665676 | -1.930095 | -0.977174 |
| 1  | -2.508541 | -1.960721 | 1.460650  |
| 1  | -3.293789 | -1.450365 | -1.443298 |
| 53 | 2.173632  | -0.317105 | -0.025989 |

py-1 with CO<sub>2</sub> XYZ Coordinates (the first column is atomic number)

|    |           |           |           |
|----|-----------|-----------|-----------|
| 6  | -1.200105 | -1.794758 | -0.148725 |
| 6  | -1.359324 | 0.487875  | -0.063840 |
| 6  | 0.052738  | 0.652062  | -0.041302 |
| 6  | 0.787880  | -0.518341 | -0.052833 |
| 6  | 0.182675  | -1.773208 | -0.111366 |
| 1  | -1.735728 | -2.738677 | -0.196910 |
| 6  | 0.652027  | 2.038722  | 0.003679  |
| 1  | 0.759748  | -2.686874 | -0.123378 |
| 6  | -0.354536 | 3.111198  | -0.411958 |
| 6  | -1.683070 | 2.893613  | 0.299441  |
| 1  | 1.527033  | 2.079167  | -0.648317 |
| 1  | 0.039244  | 4.103329  | -0.183134 |
| 1  | -2.418933 | 3.634162  | -0.016882 |
| 7  | -2.182941 | 1.578735  | -0.047905 |
| 1  | -3.159739 | 1.365328  | 0.092485  |
| 7  | -1.960638 | -0.703539 | -0.119240 |
| 1  | 1.018369  | 2.239794  | 1.017171  |
| 1  | -0.526752 | 3.060758  | -1.490353 |
| 1  | -1.547212 | 2.999055  | 1.385288  |
| 53 | 2.910563  | -0.455326 | 0.053017  |
| 6  | -4.590729 | -1.205431 | 0.073189  |
| 8  | -4.396644 | -2.334967 | -0.055673 |
| 8  | -4.870376 | -0.090098 | 0.211476  |

py-2 XYZ Coordinates (the first column is atomic number)

|   |           |           |           |
|---|-----------|-----------|-----------|
| 6 | 1.145641  | -0.288874 | -0.009523 |
| 6 | 1.203029  | 1.111520  | -0.010884 |
| 6 | 0.000004  | 1.798745  | -0.000009 |
| 6 | -1.203029 | 1.111520  | 0.010888  |
| 6 | -1.145649 | -0.288864 | 0.009624  |
| 1 | 2.155051  | 1.627033  | -0.034890 |
| 1 | -0.000000 | 2.883633  | -0.000049 |
| 1 | -2.155045 | 1.627049  | 0.034813  |
| 7 | -0.000001 | -0.970949 | 0.000045  |
| 7 | -2.296602 | -1.050638 | 0.071813  |
| 1 | -3.132018 | -0.634099 | -0.306915 |
| 1 | -2.156543 | -2.014128 | -0.191806 |
| 7 | 2.296596  | -1.050633 | -0.071887 |
| 1 | 3.132053  | -0.634095 | 0.306751  |
| 1 | 2.156582  | -2.014132 | 0.191726  |

py-2 with CO<sub>2</sub> XYZ Coordinates (the first column is atomic number)

|   |           |           |           |
|---|-----------|-----------|-----------|
| 6 | -0.760924 | -1.147586 | 0.056603  |
| 6 | -2.161947 | -1.200229 | 0.058385  |
| 6 | -2.849361 | 0.000180  | 0.000285  |
| 6 | -2.161827 | 1.200406  | -0.058109 |
| 6 | -0.760726 | 1.147504  | -0.056772 |
| 1 | -2.677173 | -2.150975 | 0.115067  |
| 1 | -3.934243 | 0.000215  | 0.000449  |
| 1 | -2.676820 | 2.151279  | -0.114820 |
| 7 | -0.075172 | -0.000043 | -0.000188 |
| 7 | -0.014396 | 2.299621  | -0.166254 |
| 1 | -0.467138 | 3.155547  | 0.109583  |
| 1 | 0.947012  | 2.217483  | 0.126556  |
| 7 | -0.014637 | -2.299752 | 0.165540  |
| 1 | -0.467781 | -3.155765 | -0.109349 |
| 1 | 0.946577  | -2.217938 | -0.127956 |
| 6 | 2.754116  | -0.000018 | 0.000178  |
| 8 | 2.793818  | 1.099231  | 0.352724  |
| 8 | 2.794059  | -1.099252 | -0.352303 |

py-3 XYZ Coordinates (the first column is atomic number)

|   |           |           |           |
|---|-----------|-----------|-----------|
| 6 | -1.140208 | 0.716485  | 0.003289  |
| 6 | -1.209789 | 2.108774  | 0.003384  |
| 6 | -0.000006 | 2.788754  | -0.000184 |
| 6 | 1.209771  | 2.108770  | -0.003611 |
| 6 | 1.140185  | 0.716479  | -0.003242 |
| 1 | -2.159916 | 2.618412  | 0.006365  |
| 1 | -0.000005 | 3.872502  | -0.000293 |
| 1 | 2.159900  | 2.618405  | -0.006670 |
| 7 | 2.268176  | -0.122048 | -0.006306 |
| 1 | 2.042260  | -1.107374 | -0.008840 |
| 7 | -2.268201 | -0.122036 | 0.006502  |
| 1 | -2.042292 | -1.107363 | 0.009248  |
| 7 | -0.000011 | 0.034854  | 0.000089  |
| 6 | 3.572718  | 0.253609  | -0.008868 |
| 8 | 4.015425  | 1.371205  | -0.011982 |
| 6 | -3.572743 | 0.253625  | 0.009257  |
| 8 | -4.015448 | 1.371221  | 0.012503  |
| 6 | 4.560880  | -0.933519 | 0.001486  |
| 6 | -4.560873 | -0.933522 | -0.001503 |
| 9 | 3.935012  | -2.120941 | -0.053291 |
| 9 | 5.286747  | -0.906670 | 1.112717  |
| 9 | 5.377498  | -0.852697 | -1.040137 |
| 9 | -3.935061 | -2.120868 | 0.055519  |
| 9 | -5.284814 | -0.907844 | -1.114061 |
| 9 | -5.379283 | -0.851658 | 1.038585  |

py-3 with CO<sub>2</sub> XYZ Coordinates (the first column is atomic number)

|   |           |           |           |
|---|-----------|-----------|-----------|
| 6 | 1.143036  | 1.058172  | 0.009361  |
| 6 | 1.207897  | 2.448844  | -0.066238 |
| 6 | -0.000050 | 3.128446  | -0.104126 |
| 6 | -1.208008 | 2.448892  | -0.066185 |
| 6 | -1.143167 | 1.058209  | 0.009348  |
| 1 | 2.157411  | 2.958210  | -0.091648 |
| 1 | -0.000023 | 4.210601  | -0.162927 |
| 1 | -2.157526 | 2.958261  | -0.091525 |
| 7 | -2.282697 | 0.238814  | 0.056188  |
| 1 | -2.086557 | -0.752614 | 0.114039  |
| 7 | 2.282539  | 0.238728  | 0.056130  |
| 1 | 2.086416  | -0.752737 | 0.113793  |
| 7 | -0.000084 | 0.373009  | 0.044784  |
| 6 | -3.580953 | 0.639289  | 0.037319  |
| 8 | -4.007742 | 1.762154  | -0.010352 |
| 6 | 3.580782  | 0.639226  | 0.037332  |
| 8 | 4.007589  | 1.762096  | -0.010255 |
| 6 | -4.584116 | -0.535449 | 0.048047  |

|   |           |           |           |
|---|-----------|-----------|-----------|
| 6 | 4.584082  | -0.535385 | 0.048086  |
| 9 | -4.001938 | -1.700132 | 0.368959  |
| 9 | -5.126603 | -0.671709 | -1.159607 |
| 9 | -5.551474 | -0.301099 | 0.921407  |
| 9 | 4.001873  | -1.700374 | 0.367825  |
| 9 | 5.550745  | -0.301426 | 0.922319  |
| 9 | 5.127505  | -0.670761 | -1.159252 |
| 6 | 0.000229  | -2.567792 | -0.131302 |
| 8 | 1.154725  | -2.584245 | -0.131720 |
| 8 | -1.154246 | -2.585103 | -0.130944 |

py-4 XYZ Coordinates

|   |             |             |             |
|---|-------------|-------------|-------------|
| C | 1.14145200  | 0.23349600  | 0.46783800  |
| C | 1.20878500  | 1.57118800  | 0.07526500  |
| C | 0.00003300  | 2.22287800  | -0.12307900 |
| C | -1.20873200 | 1.57115100  | 0.07517000  |
| C | -1.14143100 | 0.23348500  | 0.46778500  |
| H | 2.15820400  | 2.08005400  | -0.01095400 |
| H | 0.00000300  | 3.26853000  | -0.40897400 |
| H | -2.15813400 | 2.08002300  | -0.01120100 |
| N | -2.28124500 | -0.54199700 | 0.72633200  |
| H | -2.08561600 | -1.49088000 | 1.02207300  |
| N | 2.28128600  | -0.54196800 | 0.72642400  |
| H | 2.08561400  | -1.49086200 | 1.02209800  |
| N | 0.00002500  | -0.42724900 | 0.64009300  |
| S | -3.77482900 | -0.34922200 | 0.00800800  |
| S | 3.77480100  | -0.34925100 | 0.00799100  |
| O | -4.55400600 | -1.46260000 | 0.48976600  |
| O | -4.19543100 | 1.01914700  | 0.19170700  |
| O | 4.55393900  | -1.46270500 | 0.48964500  |
| O | 4.19551800  | 1.01910500  | 0.19173900  |
| C | -3.45814700 | -0.57541100 | -1.73369200 |
| H | -4.40314400 | -0.40986300 | -2.24856300 |
| H | -2.72012600 | 0.15880600  | -2.05418300 |
| H | -3.10560900 | -1.59168600 | -1.89485200 |
| C | 3.45804400  | -0.57532500 | -1.73371100 |
| H | 2.72016700  | 0.15904100  | -2.05418700 |
| H | 4.40308300  | -0.40990200 | -2.24854700 |
| H | 3.10534900  | -1.59153200 | -1.89494300 |

py-4 with CO<sub>2</sub> XYZ Coordinates

|   |             |             |             |
|---|-------------|-------------|-------------|
| C | 1.14511019  | -0.74004451 | -0.46972549 |
| C | 1.20831445  | -2.00373307 | 0.11823927  |
| C | -0.00016441 | -2.61609680 | 0.41662416  |
| C | -1.20859932 | -2.00360334 | 0.11830239  |
| C | -1.14526693 | -0.73991674 | -0.46961637 |
| H | 2.15834331  | -2.49277987 | 0.27829837  |
| H | -0.00020583 | -3.60622359 | 0.85793348  |
| H | -2.15867838 | -2.49254992 | 0.27838250  |
| N | -2.28964922 | -0.03056092 | -0.86070614 |
| H | -2.09679505 | 0.87055471  | -1.28185599 |
| N | 2.28957620  | -0.03080704 | -0.86076540 |
| H | 2.09690243  | 0.87034626  | -1.28194370 |
| N | -0.00005548 | -0.10696566 | -0.72995301 |
| S | -3.75979705 | -0.06543296 | -0.06264326 |
| S | 3.75960841  | -0.06562779 | -0.06246731 |
| O | -4.56396103 | 0.91857794  | -0.74266083 |
| O | -4.17303964 | -1.44371068 | 0.05661835  |
| O | 4.56386852  | 0.91843704  | -0.74229523 |
| O | 4.17297412  | -1.44385609 | 0.05696096  |
| C | -3.38879041 | 0.52485228  | 1.57959478  |
| H | -4.31654399 | 0.47291499  | 2.14720730  |
| H | -2.63881899 | -0.12902546 | 2.02337487  |
| H | -3.03367547 | 1.54985883  | 1.50569768  |
| C | 3.38829509  | 0.52465997  | 1.57970223  |
| H | 2.63814302  | -0.12913368 | 2.02330146  |
| H | 4.31590728  | 0.47260408  | 2.14753583  |
| H | 3.03334556  | 1.54971805  | 1.50571099  |
| C | 0.00061357  | 2.57883356  | 0.11541197  |
| O | -1.15420666 | 2.60004159  | 0.12654311  |
| O | 1.15547976  | 2.59917456  | 0.12319621  |

py-5 XYZ Coordinates

|    |             |             |             |
|----|-------------|-------------|-------------|
| C  | -0.00004000 | 1.72373800  | 0.00022100  |
| N  | -1.18593000 | 1.16090700  | -0.00788500 |
| C  | -1.12178000 | -0.19004900 | -0.01826500 |
| C  | 1.12173900  | -0.19005300 | -0.01306300 |
| N  | 1.18584100  | 1.16097800  | -0.00157600 |
| N  | 0.00002900  | -0.91463500 | -0.02221600 |
| Cl | -0.00016600 | 3.47183700  | 0.01463300  |
| N  | 2.29055800  | -0.85098700 | -0.01490200 |
| H  | 2.23142600  | -1.85712500 | -0.02855200 |
| N  | -2.29047700 | -0.85126200 | -0.02392800 |
| H  | -2.23092400 | -1.85725800 | -0.04478900 |
| C  | 3.58828300  | -0.19609900 | -0.01118600 |
| C  | 4.69669900  | -1.23806200 | 0.00517600  |

|   |             |             |             |
|---|-------------|-------------|-------------|
| H | 3.66178000  | 0.45828800  | 0.86230900  |
| H | 3.67607300  | 0.44573800  | -0.89302800 |
| C | 6.08495500  | -0.60397000 | 0.01010000  |
| H | 4.58228400  | -1.87560700 | 0.88995700  |
| H | 4.59578900  | -1.88983400 | -0.87099400 |
| C | 7.19757300  | -1.64786400 | 0.02750600  |
| H | 6.19297400  | 0.03702900  | -0.87090500 |
| H | 6.17972700  | 0.05203600  | 0.88152800  |
| H | 8.18404800  | -1.18122100 | 0.03081000  |
| H | 7.12635200  | -2.28211600 | 0.91472300  |
| H | 7.13962300  | -2.29759300 | -0.84943600 |
| C | -3.58836300 | -0.19677800 | -0.03490900 |
| C | -4.69656800 | -1.23816500 | 0.00920900  |
| H | -3.67889900 | 0.42400400  | -0.93170200 |
| H | -3.65937500 | 0.47801500  | 0.82282500  |
| C | -6.08490900 | -0.60427600 | 0.00066200  |
| H | -4.59762000 | -1.91163500 | -0.85074000 |
| H | -4.58002400 | -1.85342200 | 0.90923900  |
| C | -7.19735000 | -1.64745100 | 0.04726100  |
| H | -6.17786700 | 0.07384700  | 0.85519100  |
| H | -6.19487900 | 0.01395100  | -0.89623400 |
| H | -8.18387500 | -1.18094000 | 0.04114900  |
| H | -7.14153200 | -2.31932000 | -0.81298700 |
| H | -7.12383200 | -2.25889900 | 0.95015100  |

py-5 with CO<sub>2</sub> XYZ Coordinates

|    |             |             |             |
|----|-------------|-------------|-------------|
| C  | -0.00036300 | 2.21925200  | -0.01397800 |
| N  | -1.18593000 | 1.65684200  | -0.01256300 |
| C  | -1.12681900 | 0.30582200  | -0.00646200 |
| C  | 1.12656900  | 0.30613800  | -0.00467800 |
| N  | 1.18536100  | 1.65717000  | -0.01063000 |
| N  | -0.00003900 | -0.41924900 | -0.00335700 |
| Cl | -0.00060000 | 3.96684400  | -0.02159200 |
| N  | 2.29633800  | -0.34809700 | 0.00068800  |
| H  | 2.25234000  | -1.35599100 | -0.00096000 |
| N  | -2.29649800 | -0.34864300 | -0.00202100 |
| H  | -2.25254000 | -1.35653100 | -0.00623900 |
| C  | 3.58791700  | 0.32043600  | -0.00623900 |
| C  | 4.70514700  | -0.71154200 | 0.03022600  |
| H  | 3.65376100  | 0.99137600  | 0.85509700  |
| H  | 3.67064300  | 0.94731800  | -0.89925600 |
| C  | 6.08755200  | -0.06491500 | 0.02403600  |
| H  | 4.59508900  | -1.33375600 | 0.92621900  |
| H  | 4.61009300  | -1.38109900 | -0.83293900 |
| C  | 7.20946000  | -1.09823900 | 0.06312600  |
| H  | 6.19111200  | 0.55966400  | -0.86928200 |
| H  | 6.17565300  | 0.60900200  | 0.88248300  |

|   |             |             |             |
|---|-------------|-------------|-------------|
| H | 8.19180900  | -0.62291200 | 0.05852800  |
| H | 7.14241000  | -1.71571700 | 0.96239500  |
| H | 7.15829100  | -1.76557700 | -0.80089800 |
| C | -3.58816200 | 0.31967700  | -0.01307000 |
| C | -4.70528000 | -0.71211300 | 0.03146700  |
| H | -3.67185600 | 0.94046000  | -0.91033500 |
| H | -3.65322900 | 0.99644100  | 0.84366200  |
| C | -6.08773500 | -0.06563400 | 0.02174100  |
| H | -4.61098500 | -1.38775900 | -0.82705700 |
| H | -4.59436400 | -1.32797400 | 0.93170300  |
| C | -7.20954800 | -1.09871700 | 0.06901000  |
| H | -6.17519300 | 0.61432200  | 0.87547700  |
| H | -6.19203500 | 0.55262700  | -0.87587700 |
| H | -8.19192700 | -0.62348300 | 0.06201100  |
| H | -7.15914000 | -1.77204900 | -0.79039800 |
| H | -7.14163700 | -1.70992500 | 0.97248700  |
| C | 0.00111300  | -3.20020900 | -0.05249800 |
| O | 1.15563600  | -3.23722300 | -0.05142500 |
| O | -1.15336500 | -3.23786200 | -0.05490800 |
